# Supplementary material for: Synthesis of Co2SnO4 hollow cubes encapsulated in graphene as high capacity anode materials for lithium-ion batteries
Source: Royal Society of Chemistry journal article supplement (doi:10.1039/c3ta13228e), 2013-12-10
Supplement: c3ta13228e.pdf [file c3ta13228e.pdf]

# Electronic Supplementary Information

## Synthesis of $\text{Co}_2\text{SnO}_4$ hollow cubes encapsulated in graphene as high capacity anode materials for Lithium-Ion Batteries

Jingjing Zhang<sup>a</sup>, Jianwen Liang<sup>a</sup>, Yongchun Zhu<sup>a,\*,\*</sup>, Denghu Wei<sup>a</sup>, Long Fan<sup>a</sup> and  
Yitai Qian<sup>a, b, \*</sup>

<sup>a</sup> Hefei National Laboratory for Physical Science at Microscale and Department of Chemistry, University of Science and Technology of China, Hefei, 230026, P.R. China. Tel: +86-551-63601589; E-mail: ychzhu@ustc.edu.cn

<sup>b</sup> School of Chemistry and Chemical Engineering, Shandong University, Jinan, 250100, PR China. Tel: +86-551-63607234; E-mail: ytqian@ustc.edu.cn

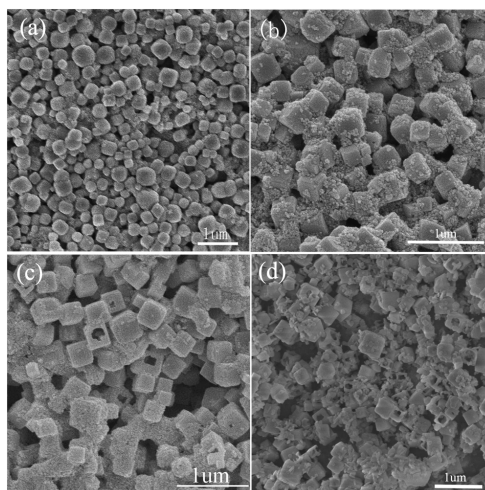

**Fig. S1.** SEM images of a series of temperature-dependent experiments of precursor (a) prepared at room temperature, (b) at 100 °C, (c) at 120 °C and (d) 140 °C.

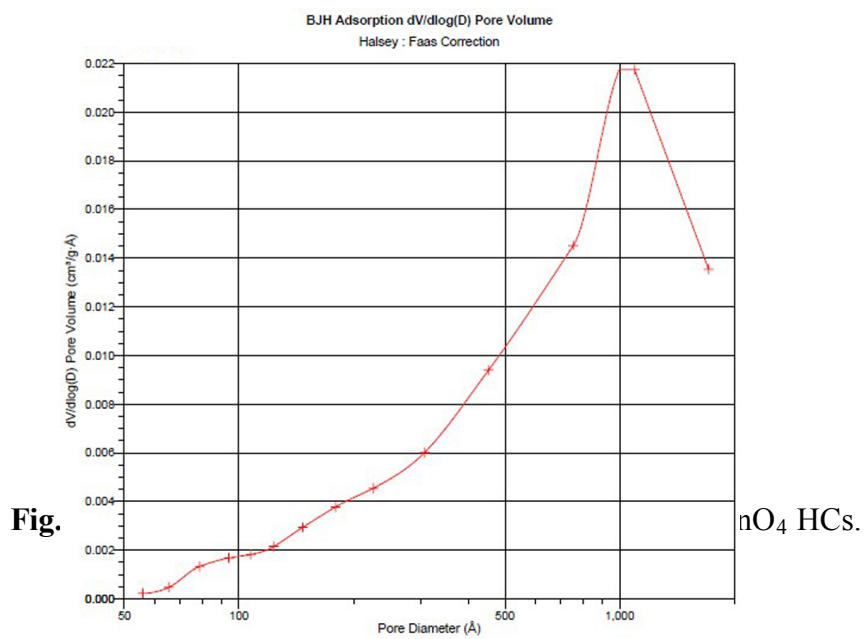

**Fig. S3.** BJH porous distribution of  $\text{Co}_2\text{SnO}_4$  HCs ( $V$  = differential pore volume,  $D$  = pore size)

**Fig. S4.** SEM images of (a,b) the precursor and its TEM pattern (inset b) and (c,d)

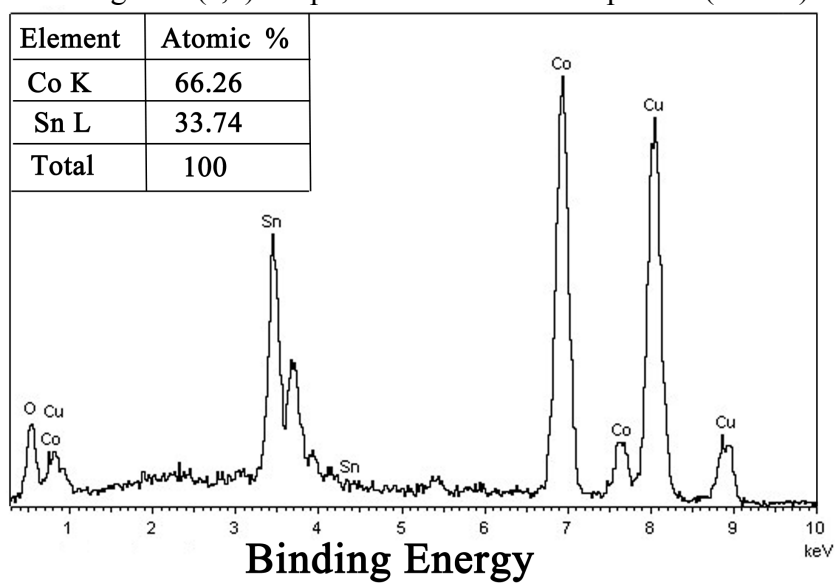

**Fig. S5.** Typical EDX spectrums of  $\text{Co}_2\text{SnO}_4$  HCs.

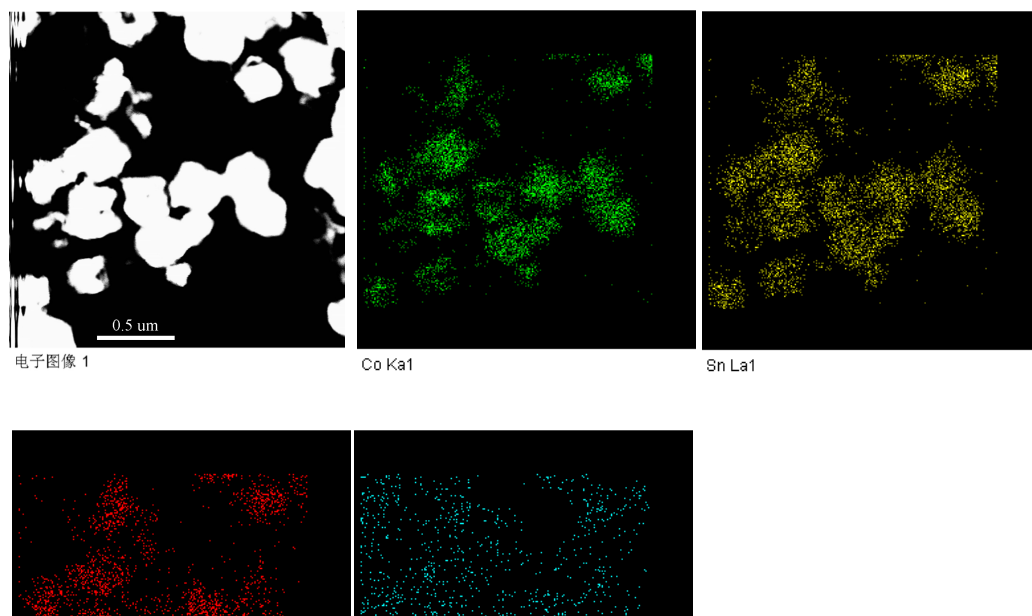

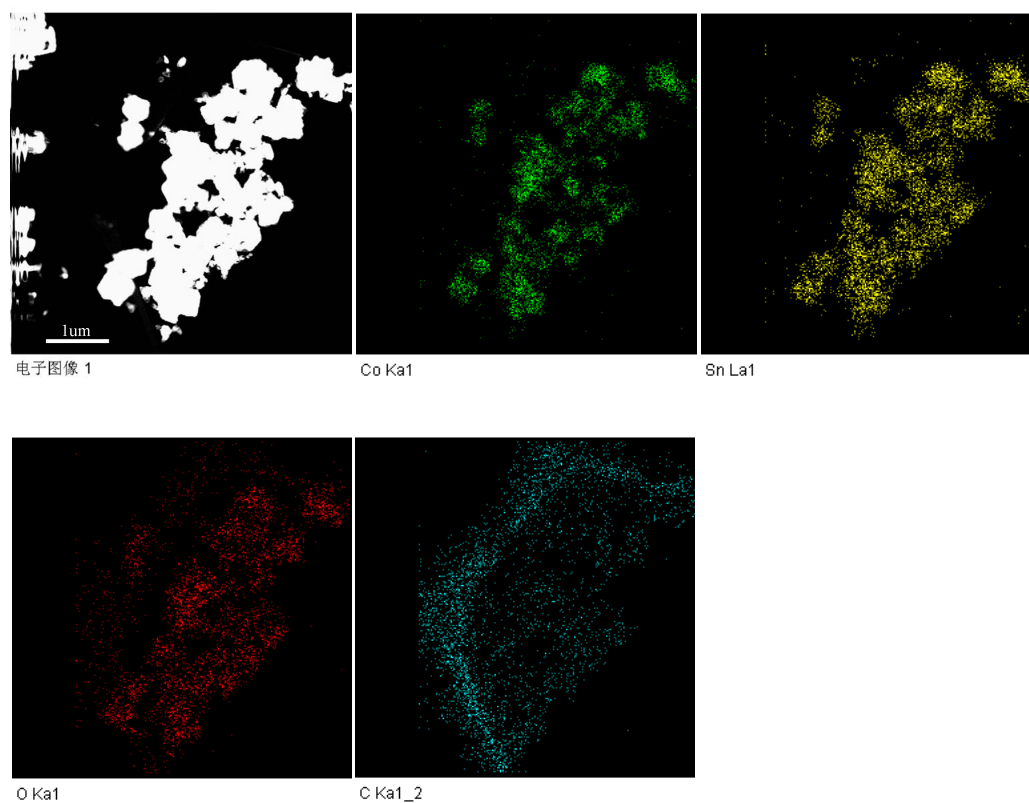

**Fig. S6.** TEM image and corresponding oxygen, cobalt, tin, and carbon elemental mapping of  $\text{Co}_2\text{SnO}_4$  HCs@GO.

**Fig. S7.** Typical XRD patterns of  $\text{Co}_2\text{SnO}_4$  HCs@rGO.

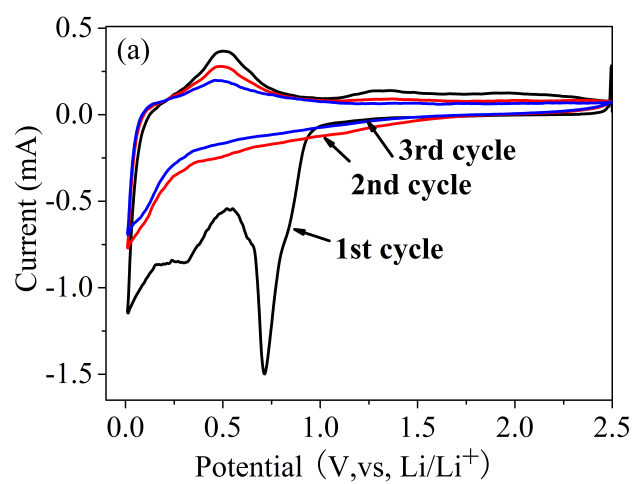

**Fig. S8.** Cyclic voltammograms of  $\text{Co}_2\text{SnO}_4$  NCs at a scanning rate of  $0.1 \text{ mVs}^{-1}$ .

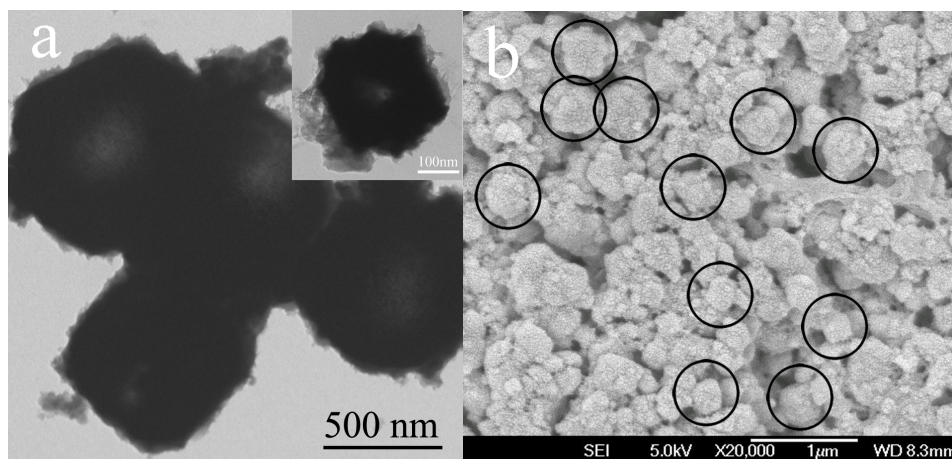

**Figure S9.** (a) TEM (high-magnification TEM image inset) and (b) FESEM images of  $\text{Co}_2\text{SnO}_4$  HCs@GO after cycling for 100cycles. In the FESEM image, the hollow cubes are marked with black circle.

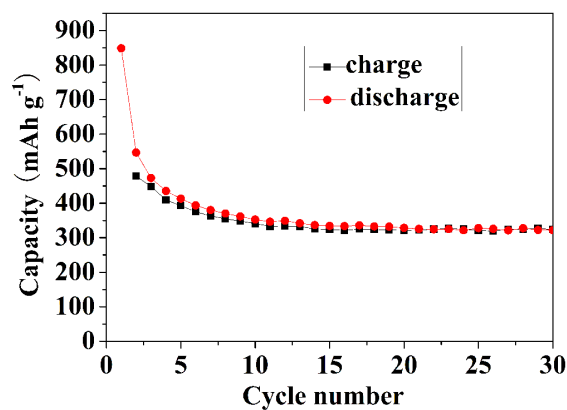

**Fig. S10.** Charge/discharge profiles of the graphite.

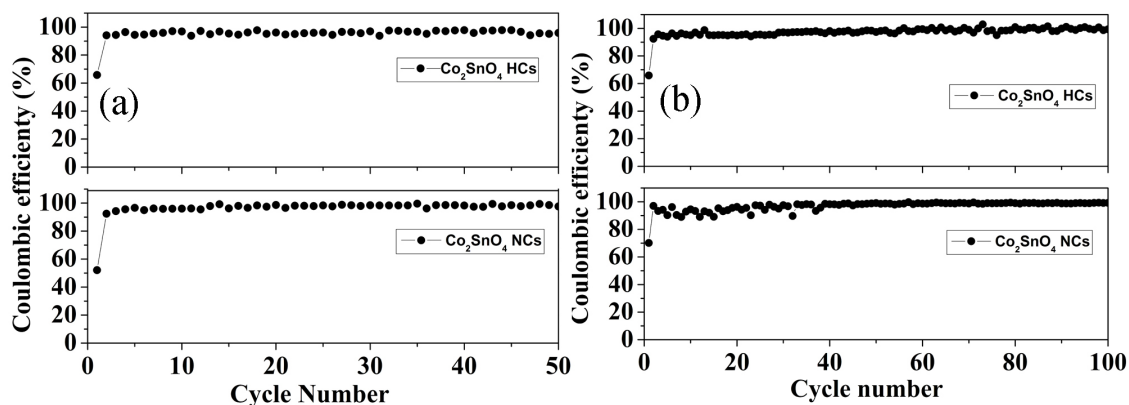

**Fig. S11.** Coulombic efficiency of (a) cycle performance at a current density of  $100 \text{ mA g}^{-1}$  between 0.01 and 2.5 V and (b) Rate capability at various current densities between 0.01 and 2.5 V for  $\text{Co}_2\text{SnO}_4$  NCs and  $\text{Co}_2\text{SnO}_4$  HCs.

For  $\text{Co}_2\text{SnO}_4$  NCs and  $\text{Co}_2\text{SnO}_4$  HCs, the coulombic efficiency maintains

consistently at ~97% up to 100 cycles (shown in Fig. S11a) and also keeps at ~97% following the rising rates (in Fig. S11b).

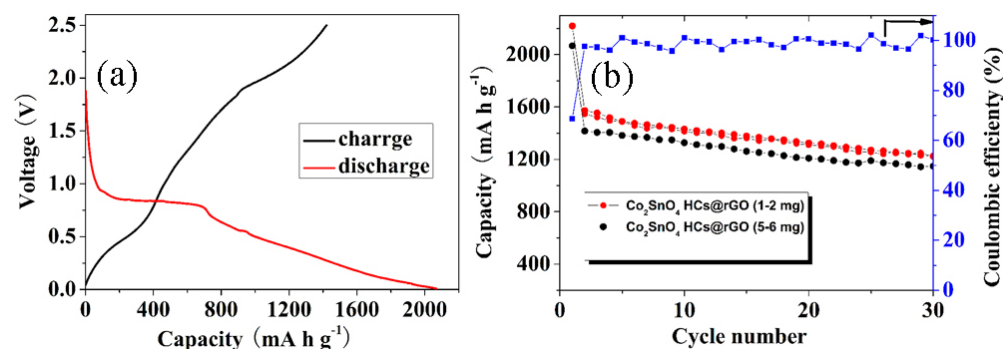

**Fig. S12.** (a) The initial discharge-charge curves for  $\text{Co}_2\text{SnO}_4$  HCs@rGO (5-6 mg) at a current density of  $100 \text{ mA g}^{-1}$  between 0.01 and 2.5 V, (b) cycle performance at a current density of  $100 \text{ mA g}^{-1}$  between 0.01 and 2.5 V, and the coulombic efficiency of the  $\text{Co}_2\text{SnO}_4$  HCs@rGO (5-6 mg).

Table 1 comparison between  $\text{Co}_2\text{SnO}_4$  hollow cubes/graphene composite ( $\text{Co}_2\text{SnO}_4$  HCs@rGO) (this work) and the reported  $\text{Co}_2\text{SnO}_4$  compounds.

| Material                          | Reversible capacity ( $\text{mAh g}^{-1}$ ) | Percentage of theoretical capacity | current density ( $\text{mA g}^{-1}$ ) | Ref.      |
|-----------------------------------|---------------------------------------------|------------------------------------|----------------------------------------|-----------|
| $\text{Co}_2\text{SnO}_4$ HCs@rGO | 1016.2/100cycles                            | 91.9%                              | 100                                    | this work |
| $\text{Co}_2\text{SnO}_4$ HCs     | 410/100cycles                               | 37.1%                              | 100                                    | this work |
| $\text{Co}_2\text{SnO}_4$ NCs     | 179/100cycles                               | 16.2%                              | 100                                    | this work |

---

|                                                                       |                |       |     |    |
|-----------------------------------------------------------------------|----------------|-------|-----|----|
| solid $\text{Co}_2\text{SnO}_4$                                       | 490/2cycles    | 44.3% | 50  | 6  |
| bulk $\text{Co}_2\text{SnO}_4$                                        | 112.8/50cycles | 11%   | 30  | 8  |
| $\text{Co}_2\text{SnO}_4$ nanocrystals                                | 555.9/50cycles | 50.3% | 30  | 8  |
| $\text{Co}_2\text{SnO}_4$ @C core-shell nanostructures                | 474/75cycles   | 42.8% | 100 | 18 |
| $\text{Co}_2\text{SnO}_4$ nanoparticles@ multiwalled carbon nanotubes | 898.8/50cycles | 81.3% | 50  | 19 |
